# Supplementary material for: Re-assessment of YAP1 and MCR1 contributions to inhibitor tolerance in robust engineered Saccharomyces cerevisiae fermenting undetoxified lignocellulosic hydrolysate
Source: PubMed Central journal article supplement (PMC4105880; doi:10.1186/s13568-014-0056-5), 2014-07-22
Supplement: s13568-014-0056-5-S1.pdf [file s13568-014-0056-5-S1.pdf]

## **Additional file 1**

### **Article title:**

Re-assessment of *YAPI* and *MCR1* contributions to inhibitor tolerance in robust engineered *Saccharomyces cerevisiae* fermenting undetoxified lignocellulosic hydrolysate

### **Journal:**

AMB Express

### **Author names:**

Valeria Wallace-Salinas<sup>1+</sup>, Lorenzo Signori<sup>2+</sup>, Ying-Ying Li<sup>3,4</sup>, Magnus Ask<sup>5</sup>, Maurizio Bettiga<sup>5</sup>, Danilo Porro<sup>2</sup>, Johan M Thevelein<sup>3,4</sup>, Paola Branduardi<sup>2</sup>, María R Foulquié-Moreno<sup>3,4</sup>, Marie Gorwa-Grauslund<sup>1\*</sup>

### **Corresponding author:**

Marie Gorwa-Grauslund. Applied Microbiology, Department of Chemistry, Lund University, P.O. Box 124, SE-22100 Lund, Sweden.

marie-francoise.gorwa-grauslund@tmb.lth.se

Table S1. Oligonucleotides used during the study

| <b>Name</b>   | <b>Sequence 5'----3'</b>                               |
|---------------|--------------------------------------------------------|
| YAP1-F        | CTAGTGAATTCATGAGTGTGTCTACCGCCAAG                       |
| YAP1-R        | TGATGAAGCTTTTAGTTCATATGCTTATTCAAAGCTAATTG              |
| CassFor       | CTAGTGCATGCAGTTTATCATTATCAATACTCGCCATTTC               |
| CassRev       | TGATGAGATCTGGCCGCAAATTAAGCCTTCG                        |
| GPD-YAP1-F    | GCTAGTGACGTCGCATGCGGGAACAAAAGCTGGAGCTCAG               |
| CYC1t-YAP1-R  | GTAGACAGCTGGCTAGCGCGCGTAATACGACTCACTATAGG              |
| HR1-F         | AGTAGAGACGTCGACTGGAGCATCGAATCTGTAG                     |
| HR1-R         | AGTAGAGCATGCGTTATCTTGTGTCCACTGGTAGC                    |
| HR2-F         | AGTAGAGCTAGCGGAGAAGTCATATGACAGTGTG                     |
| HR2-R         | AGTAGAGCGGCCGCGAATAGCGTATCTTCCGCATTG                   |
| attBP-F       | TATTACGCGCGCTAGCGTGGTCGGCTGGAGATCGG                    |
| attBP-R       | TGACTTCTCCGCTAGCAGCCGTTATGGCGGGCATC                    |
| Ver.ins1-F    | CTTCAAGTCTCTTCCAGATGGCAGG                              |
| Ver.ins1-R    | GTGGATGCCAGGAATAAACTGTTAC                              |
| Ver.ins2-F    | CCTCGACATCATCTGCCAGATG                                 |
| Ver.ins2-R    | GTGGTGA ACTTCCCTTGCTTCTCTG                             |
| MCR1-F        | AGACCCATCACATCGCATCAC                                  |
| MCR1-R        | GAATTAGAGCTTAAAGCCAAGCC                                |
| YLR446W Lox-F | TTCGAATTTCTTTAATCAAATCATCTATACGCAGGTCGACAACC<br>CTTAAT |
| Lox-R         | TCTAGCACTATAGATCTTCGTAAGCATCACCTAATAACTTCGTA<br>TAGC   |
| YLR446W TER-R | GTATGCTGGAGTAATATTTTATCTGCTCTAGCTGGAGGTAGACA<br>AAGAC  |
| YLR446W-F     | AATCGGACGTCGTTTCAGAACATGACAATTGAAAGCACT                |

|                  |                                                                                                        |
|------------------|--------------------------------------------------------------------------------------------------------|
| YLR446W R        | GTTGCGACGTCTGATGAAATATATTATTGAACTGGTTGTC                                                               |
| Fw-APJ1-A2       | AAGTAAAACACATTTTTCTTTTGCTACCAGTGGACACAAGATA<br>ACGGAGAGTGGTCGGCTGGAGATCGG                              |
| Rv-APJ11-A1      | AAAAAATAAAAATAGAAAATGTATAACATTACTGCATGACTAT<br>ATAACCTAGCCGTTATGGCGGGCATC                              |
| Fw-APJ1-check    | GAACGGTAGGTATTGATTGTA                                                                                  |
| Rv-APJ1-check    | AACATATCGGTTCCACCGGT                                                                                   |
| Fw-A1-attP-tefpr | TTTGTGGTCGGCTGGAGATCGGGTAGTGCCCCAACTGGGGTAA<br>CCTTTGAGTTCTCTCAGTTGGGGGCGTAGAGATCTGTTTAGCTT<br>GCC     |
| Rv-A2-attB-teft  | TTTAGCCGTTATGGCGGGCATCGTGGAGTACGCGCCCGGGGAG<br>CCCAAGGGCACGCCCTGGCACCCGCACCGCGGGATGGCGGGCGT<br>TAGTATC |
| Fw-PstI-PhiC31   | TTTTCTGCAGGGGTGTCTCGCTACGCCGCT                                                                         |
| Rv-BamHI-PhiC31  | TTTTGGATCCGGTCGACGAGCTCACTAGTC                                                                         |

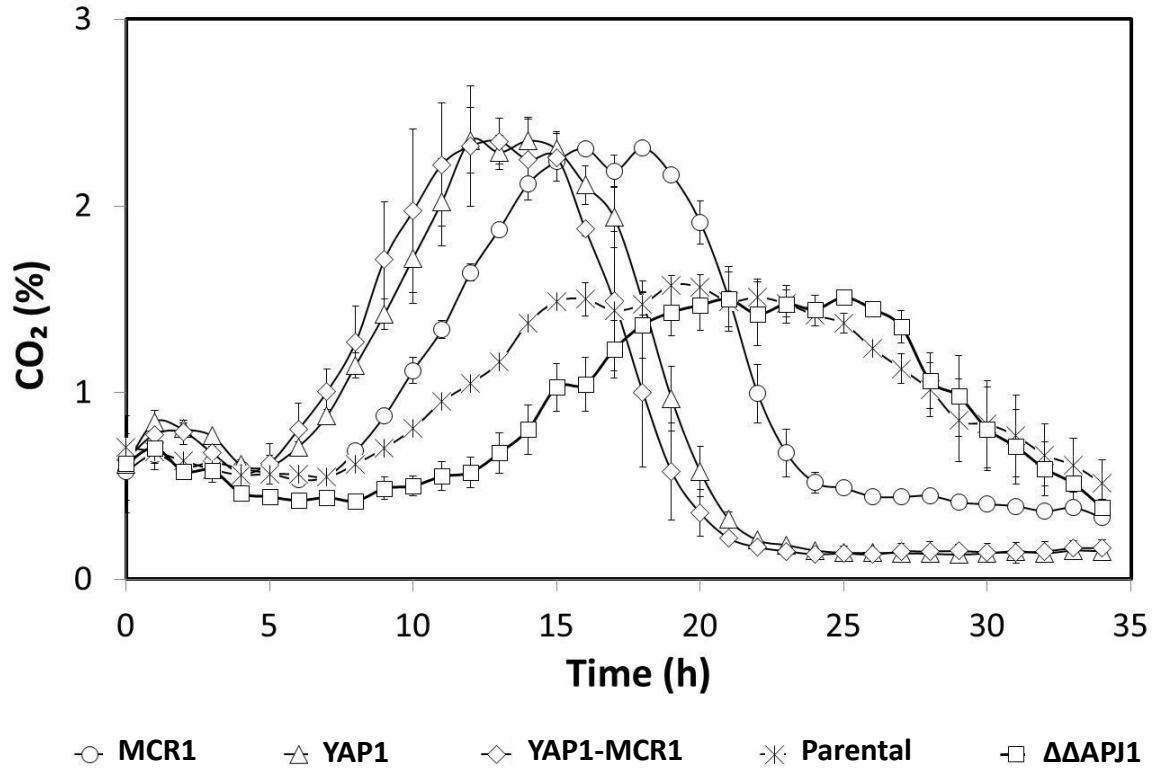

Figure S1. Carbon dioxide profile of the strains GSE16 (parental), GSE16-YAP1, GSE16-MCR1, GSE16-YAP1-MCR1 and GSE16-  $\Delta\Delta$ APJ1 during anaerobic batch fermentations of spruce hydrolysate (only shown for the first 35h)
